# Supplementary material for: Rationally engineered smart automotive upholstery leather based on gradient feeding in situ one-pot reaction in microreactors of natural skin
Source: Royal Society of Chemistry journal article supplement (doi:10.1039/d4ta06569g), 2024-01-01
Supplement: d4ta06569g1.pdf [file d4ta06569g1.pdf]

## Supporting Information

### **Rationally engineered smart automotive upholstery leather based on gradient feeding *in situ* one-pot reaction in microreactors of natural skin**

Qingxin Han,<sup>a, b, #, \*</sup> Huishu Fan,<sup>a, #</sup> Xuechuan Wang,<sup>b</sup> Junli Zhang,<sup>a</sup> Xinhua Liu,<sup>b</sup> and Xiaoyu  
Guan<sup>b, \*</sup>

<sup>a</sup> College of Bioresources Chemistry and Materials Engineering, Shaanxi University of Science and Technology, Xi'an, 710021, China.

<sup>b</sup> Institute of Biomass & Functional Materials, Shaanxi University of Science & Technology, Xi'an, 710021, China.

\* Corresponding author: hanqingxin@sust.cn; guanxiaoyu@sust.edu.cn.

# These authors contributed to the work equally and should be regarded as co-first authors.

## Table of Contents

1. Preparation.

2. Supporting figures: **Figure S1- S10.**

3. Supporting tables: **Table S1- S3.**

## 1. Preparation:

### 1.1. Preparation of ATP-KH560

ATP (6 g) and sodium hexametaphosphate (0.18 g) were dissolved in 300 mL of deionized water and stirred at 50 °C for 1 hour. The resulting mixture was then centrifuged at 2000 rpm for 10 minutes to obtain the supernatant, a dispersion of ATP rod crystals. A mixture of KH560 and the ATP dispersion was prepared at a mass ratio of 2:3 (KH560 to ATP) and stirred at 300 rpm for 1.5 hours at 50 °C, resulting in the formation of ATP-KH560.

### 1.2. Preparation of CS-GTE

For the preparation of CS-GTE, chitosan (1.3638 g) was first dissolved in 50 mL of deionized water, followed by the addition of triethylamine (0.08 g) and GTE (1.65 g). The mixture was then stirred for 2 hours at 40 °C with a stirring rate of 300 rpm to obtain the CS-GTE complex.

## 2. Supporting Figures:

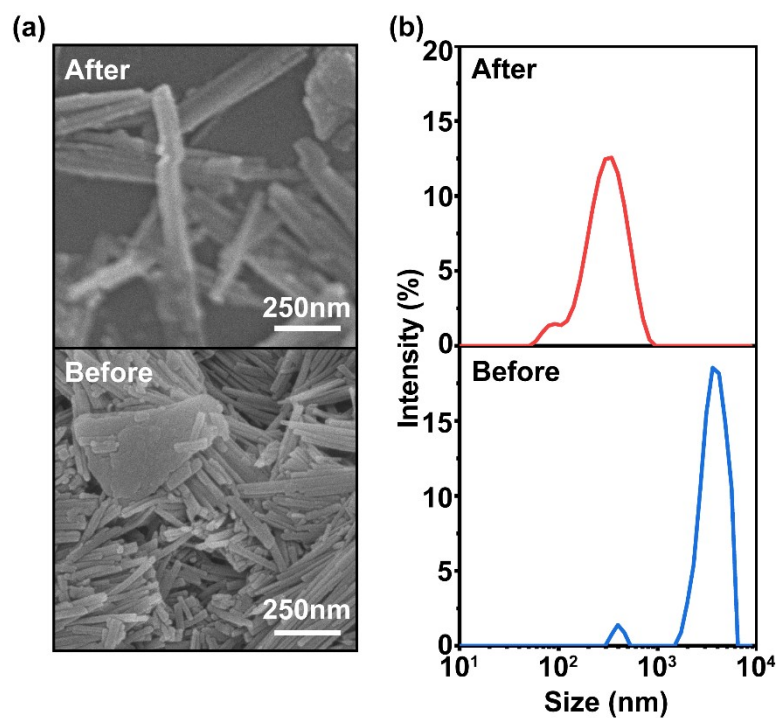

**Figure S1.** SEM images (a) and particle size distribution graph (b) before and after ATP dispersion.

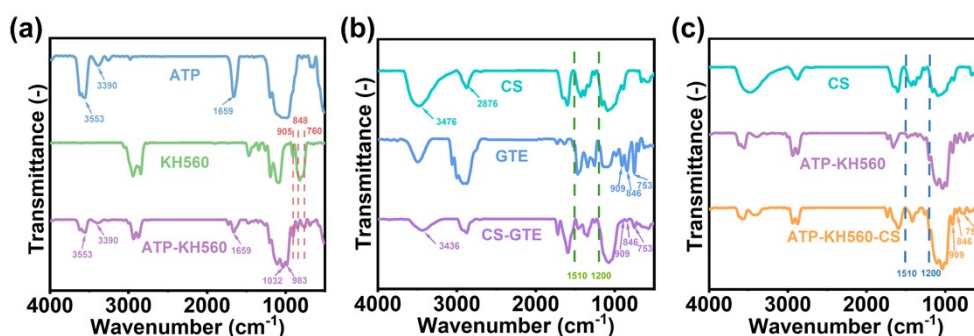

**Figure S2.** FTIR spectrum images for ATP, KH560, ATP-KH560, CS, GTE, CS-GTE, and ATP-KH560-CS.

As shown in Fig. S2a, the bands at  $3553\text{ cm}^{-1}$  and  $3390\text{ cm}^{-1}$  are attributed to the stretching vibrations of Al-OH and Fe-OH on ATP; the band at  $1659\text{ cm}^{-1}$  is attributed to the -OH stretching vibration in ATP.<sup>1</sup> Characteristic absorption peaks were shown at 909, 846, and  $753\text{ cm}^{-1}$ , which can be attributed to the terminal epoxy group in KH560. Meanwhile, the decrease in peak areas at  $3553\text{ cm}^{-1}$ ,  $3390\text{ cm}^{-1}$ , and  $1659\text{ cm}^{-1}$  and the appearance of additional peaks at  $1032\text{ cm}^{-1}$ , and  $983\text{ cm}^{-1}$  are attributed to the reaction of ATP with KH560 to form the S-oxide group. KH560 reaction to the stretching vibration of the Si-O-Si bond.<sup>2</sup> In particular, the prepared ATP-KH560 after the interaction of ATP with KH560 showed absorption peaks at 909, 846, and  $753\text{ cm}^{-1}$ , which are typical characteristic peaks of terminal epoxy groups. As shown in Fig. S2b, the band at  $3476\text{ cm}^{-1}$  can be attributed to the stretching vibrations of O-H and N-H in the methylene groups of CS.<sup>3</sup> The characteristic bands at 909, 848, and  $755\text{ cm}^{-1}$  can be attributed to the terminal epoxy groups in GTE.<sup>4</sup> After the interaction of CS and GTE, the resultant CS-GTE molecule, as compared to CS, the  $3436\text{ cm}^{-1}$  where the characteristic peaks at, were red-shifted. This may be due to the reaction of GTE with the free amino and primary alcohol hydroxyl groups of CS. The decrease in the peak area of CS-GTE in the  $1510\text{-}1200\text{ cm}^{-1}$  band compared with both CS and GTE may be due to

the reaction of the amino group of CS with the epoxy group of GTE, which introduces the -CH<sub>2</sub> group. In particular, after the interaction of CS with GTE, the prepared CS-GTE showed characteristic absorption peaks at 909, 846, and 753 cm<sup>-1</sup>, which are typical of terminal epoxy groups,<sup>4</sup> suggesting that GTE was successfully grafted onto CS to generate products containing terminal epoxy groups. Meanwhile, in this work, a simulation experiment was done in vitro in leather by adding CS to ATP-KH560 for the reaction, and as shown in Fig. S2c, the peak area of ATP-KH560-CS increased in the 1510-1200 cm<sup>-1</sup> band compared to CS, which was attributed to the epoxy group in ATP-KH560 reacting with the amino group of CS and introducing the -CH<sub>2</sub> group. In addition, the characteristic bands of ATP-KH560-CS at 909, 848, and 755 cm<sup>-1</sup> confirm the presence of epoxy groups in the material. All these phenomena verified that CS could react with ATP-KH560 inside the leather, which subsequently indicated that CS-GTE could enhance the cross-linking between ATP-KH560 and leather collagen. It is GTE that reacts with the amino group and the hydroxyl group of the primary alcohol in CS.

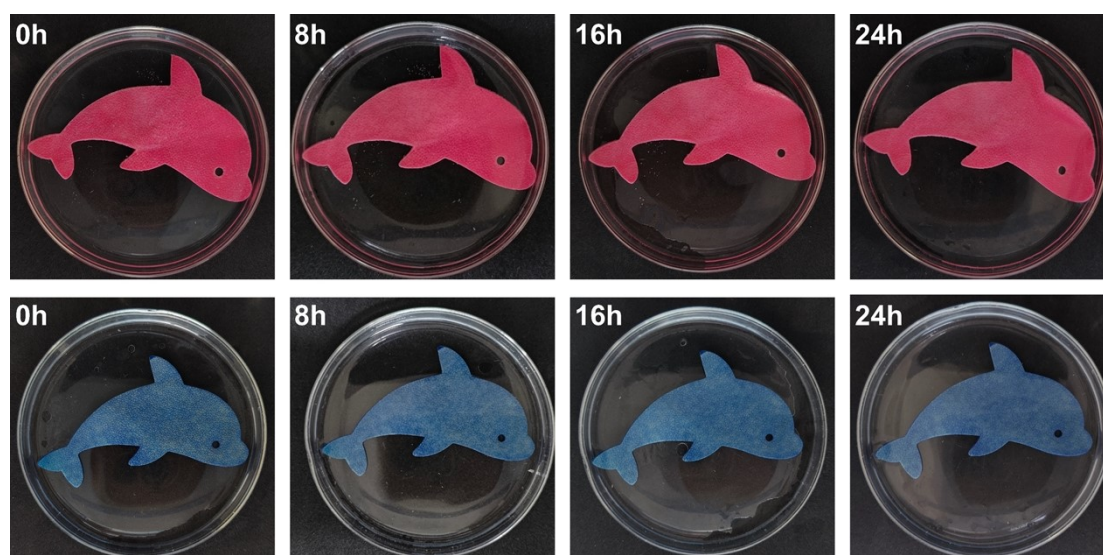

**Figure S3** Digital photographs of ACG leather samples dyed with normal and fluorescent dyes and immersed in water for 0, 8, 16 and 24 hours respectively.

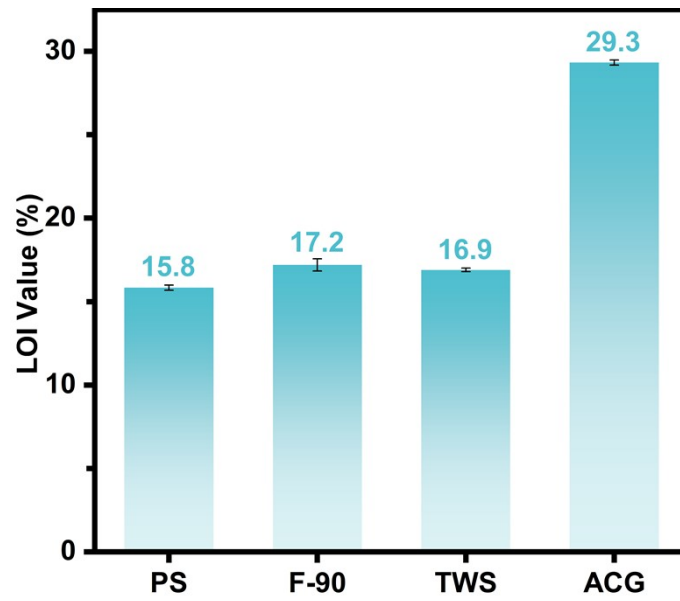

**Figure S4.** LOI values of different samples.

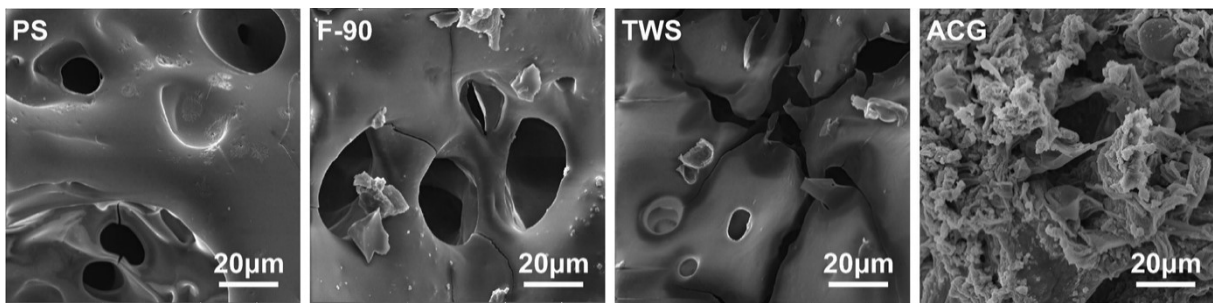

**Figure S5.** The electron micrographs of the cross-section of its post-combustion residual samples.

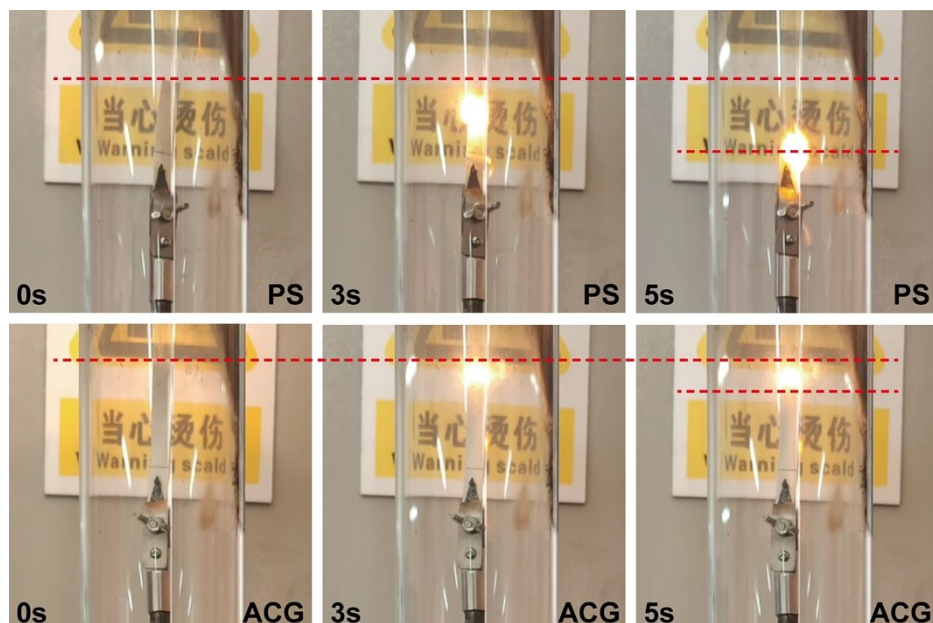

**Figure S6.** Digital images of PS and this work at 0s, 3s, and 5s in an environment with an LOI value (%) of 30%.

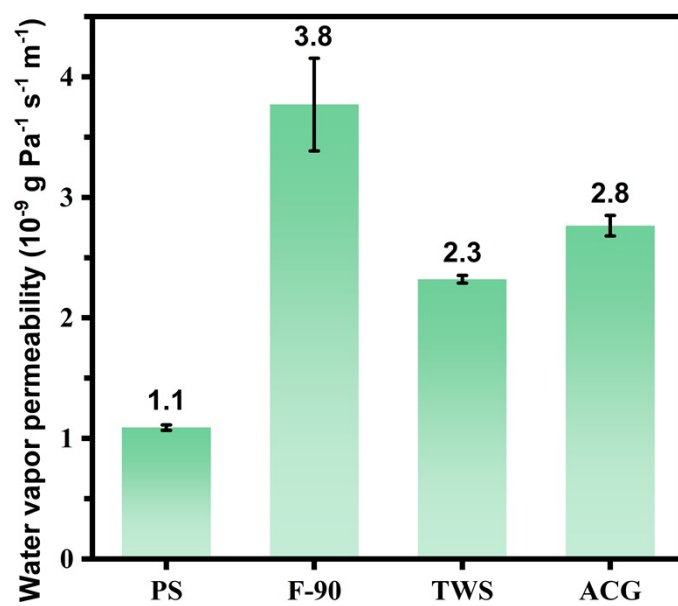

**Figure S7.** Water vapor permeability of different samples.

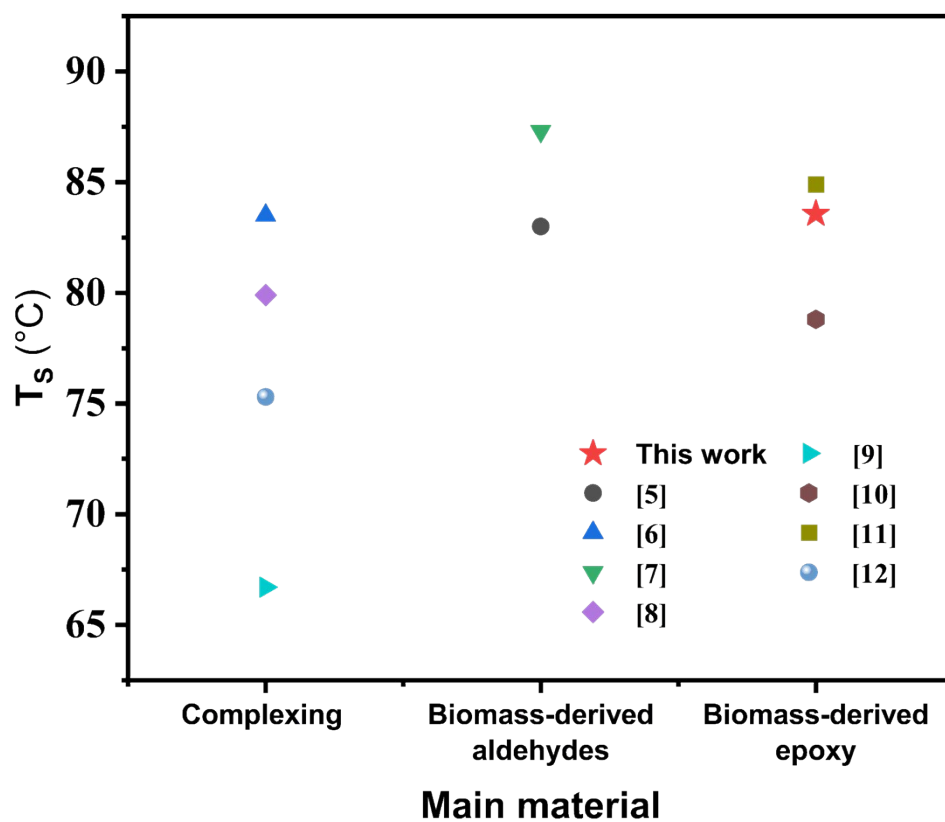

**Figure S8.** Comparison of shrinkage temperatures for traditional leathers prepared from biomass epoxy, biomass-derived aldehydes, and complexing.



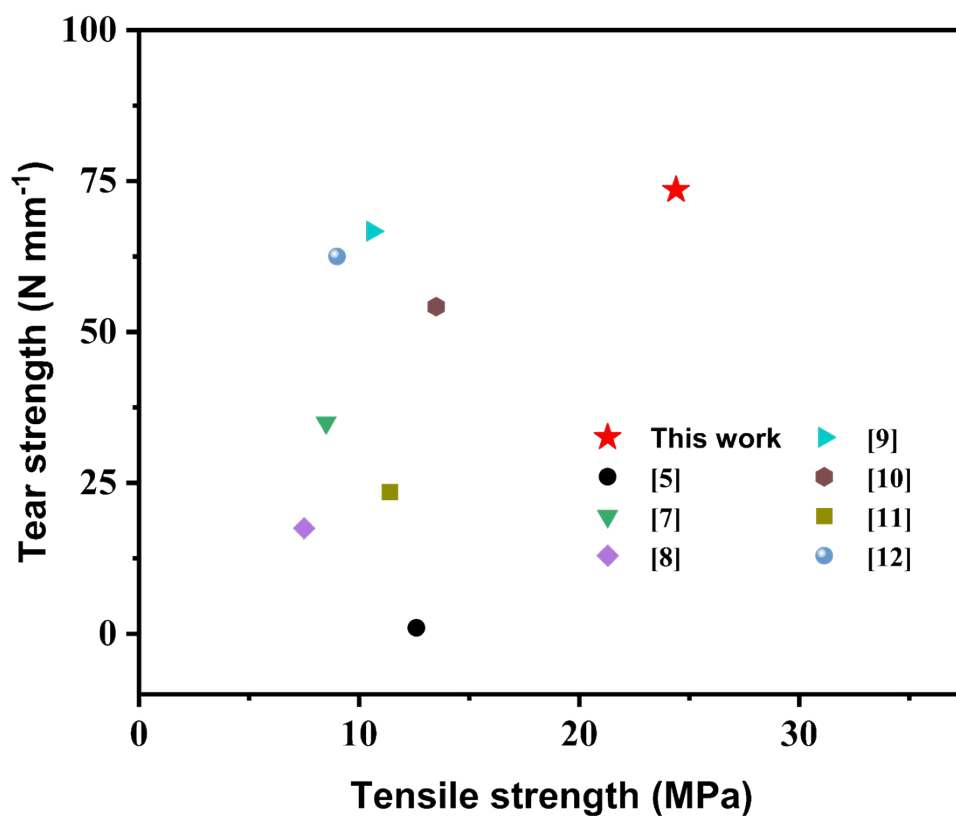

**Figure S9.** Comparison of tensile strength and tear strength for traditional leathers prepared from biomass epoxy, biomass-derived aldehydes, and complexing.

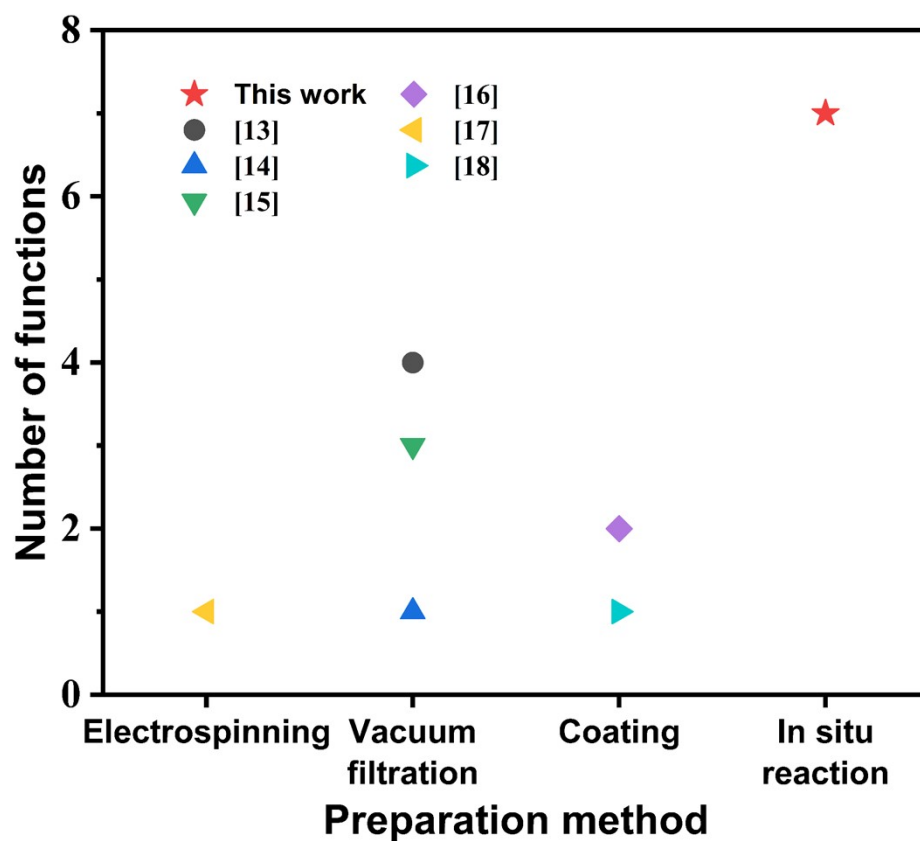

**Figure S10.** Comparison of the number of functions exhibited by single-functional and multifunctional leather-based materials, as well as leather-like materials, produced through different preparation processes.

### 3. Supporting tables:

**Table S1.** Tanning processes of TWS tanning agents.

| Operation    | material                                                | Dosage <sup>a)</sup><br>[%] | Temperature<br>[°C] | Time<br>[min] | Remarks                                                 |
|--------------|---------------------------------------------------------|-----------------------------|---------------------|---------------|---------------------------------------------------------|
| Washing      | Water                                                   | 150                         | 25                  | 20            | Check                                                   |
|              | Salt                                                    | 7                           |                     |               | pH,until the<br>pH is<br>7±,continue                    |
|              | NaHCO <sub>3</sub>                                      | 0.6                         |                     |               | the<br>mechanical<br>action for 20<br>min and<br>drain. |
| Tanning      | Water                                                   | 150                         | 25                  | 180           | Check                                                   |
|              | NaHCO <sub>3</sub> /<br>Na <sub>2</sub> CO <sub>3</sub> | 0.5                         |                     |               | pH,until the<br>pH is<br>7±,continue                    |
|              | TWS                                                     | 10                          |                     |               | the<br>mechanical<br>action for<br>180 min.             |
| Basification | NaHCO <sub>3</sub> /<br>Na <sub>2</sub> CO <sub>3</sub> | 0.6                         | 40                  | 240           | Check<br>pH,until the                                   |

pH is  
7±,continue  
the  
mechanical  
action for  
240 min,  
then stay  
overnight..

<sup>a)</sup>The dosages of materials are based on 1.5 times the weight of PS.

**Table S2.** Tanning processes of F-90 tanning agents.

| <b>Operation</b> | <b>material</b>    | <b>Dosage<sup>a)</sup><br/>[%]</b> | <b>Temperature<br/>[°C]</b> | <b>Time<br/>[min]</b> | <b>Remarks</b>                                   |
|------------------|--------------------|------------------------------------|-----------------------------|-----------------------|--------------------------------------------------|
|                  | Water              | 150                                |                             |                       | Check                                            |
|                  | Salt               | 7                                  |                             |                       | pH,until the<br>pH is<br>7±,continue             |
| Washing          |                    |                                    | 25                          | 20                    | the                                              |
|                  | NaHCO <sub>3</sub> | 0.6                                |                             |                       | mechanical<br>action for 20<br>min and<br>drain. |
| Tanning          | F-90               | 10                                 | 37                          | 120                   | Check<br>pH,until the                            |

|         |                                                         |     |    |     |                                                                                                |
|---------|---------------------------------------------------------|-----|----|-----|------------------------------------------------------------------------------------------------|
|         | Water                                                   | 40  |    |     | pH is<br>7±,continue<br>the<br>mechanical<br>action for<br>120 min.                            |
|         | NaHCO <sub>3</sub> /<br>Na <sub>2</sub> CO <sub>3</sub> | 0.6 |    |     |                                                                                                |
|         | Water                                                   | 40  |    |     | Check<br>pH,until the<br>pH is<br>6.5±,continue<br>the<br>mechanical<br>action for<br>120 min. |
|         | CH <sub>2</sub> O <sub>2</sub>                          | 0.6 | 40 | 120 |                                                                                                |
|         | Water                                                   | 40  |    |     | Check<br>pH,until the<br>pH is<br>4.5±,continue<br>the<br>mechanical<br>action for<br>120 min. |
|         | CH <sub>2</sub> O <sub>2</sub>                          | 0.6 | 45 | 120 |                                                                                                |
| Washing | Water                                                   | 150 | 40 | 20  | continue the<br>mechanical                                                                     |

---

action for 20

min then

drain..

---

<sup>a)</sup>The dosages of materials are based on 1.5 times the weight of PS.

**Table S3.** Comparison of the number of functions exhibited by single-functional and multifunctional leather-based materials, as well as leather-like materials, produced through different preparation processes.

|                                    | Preparation method | Functions          |                             |                 |                  |              |                  |                 |         |                  | Ref. |
|------------------------------------|--------------------|--------------------|-----------------------------|-----------------|------------------|--------------|------------------|-----------------|---------|------------------|------|
|                                    |                    | Thermal management | EMI shielding effectiveness | Noise reduction | Color modulation | Bactericidal | Flame retardancy | As an electrode | Sensing | Soil degradation |      |
| This work                          | In situ reaction   | +                  | +                           | +               | +                | +            | +                | -               | -       | +                | -    |
|                                    | Vacuum filtration  | +                  | +                           | -               | -                | -            | -                | +               | +       | -                | [13] |
| Leather-based functional materials | Vacuum filtration  | +                  | +                           | -               | -                | -            | -                | -               | +       | -                | [14] |
|                                    | Vacuum filtration  | +                  | +                           | -               | -                | -            | -                | -               | +       | -                | [15] |
|                                    | Coating            | +                  | +                           | -               | -                | -            | -                | -               | -       | -                | [16] |
| Leather-like functional materials  | Electrospinning    | +                  | -                           | -               | -                | -            | -                | -               | -       | -                | [17] |
|                                    | Coating            | -                  | +                           | -               | -                | -            | -                | -               | -       | -                | [18] |

## References:

- [1] F. Duan, Y. Zhu, H. Zhang, Y. Lu, A. Wang. Effect of structural evolution of attapulgite on pickering foam and fabrication of porous materials for removal methylene blue. *Chem. Eng. J.* 2023, **474**, 145942.
- [2] Z. Shen, W. Gao, P. Li, X. Wang, Q. Zheng, H. Wu, Y. Ma, W. Guan, S. Wu, Y. Yu, K. Ding. Highly sensitive nonenzymatic glucose sensor based on nickel nanoparticle - attapulgite-reduced graphene oxide-modified glassy carbon electrode. *Talanta* 2016, **159**, 194.
- [3] S. Feng, S. Dai, Z. Wei, J. Wang, N. Xiang, P. Shao. Soy conglycinin amyloid fibril and chitosan complex scaffold for cultivated meat application. *Food Hydrocolloid.* 2024, **153**, 110017.
- [4] Z. Dai, L. Ansaloni, D. L. Gin, R. D. Noble, L. Deng. Facile fabrication of co2 separation membranes by cross-linking of poly(ethylene glycol) diglycidyl ether with a diamine and a polyamine-based ionic liquid. *J. Membr. Sci.* 2017, **523**, 551.
- [5] W. Ding, X. Pang, Z. Ding, D. C. W. Tsang, Z. Jiang, B. Shi. Constructing a robust chrome-free leather tanned by biomass-derived polyaldehyde via crosslinking with chitosan derivatives. *J. Hazard. Mater.* 2020, **396**, 122771.
- [6] Z. Jiang, M. Gao, W. Ding, C. Huang, C. Hu, B. Shi, D. C. W. Tsang. Selective degradation and oxidation of hemicellulose in corncob to oligosaccharides: from biomass into masking agent for sustainable leather tanning. *J. Hazard. Mater.* 2021, **413**, 125425.
- [7] W. Ding, Y. Yi, Y. Wang, J. Zhou, B. Shi. Peroxide-periodate co-modification of carboxymethylcellulose to prepare polysaccharide-based tanning agent with high solid content. *Carbohydr. Polym.* 2019, **224**, 115169.
- [8] J. Chen, J. Ma, Q. Fan, W. Zhang, R. Guo. A sustainable chrome-free tanning approach based on zr-mofs functionalized with different metals through post-synthetic modification.



*Chem. Eng. J.* 2023, **474**, 145453.

[9] Y. Shen, J. Ma, Q. Fan, D. Gao, H. Yao. Strategical development of chrome-free tanning agent by integrating layered double hydroxide with starch derivatives. *Carbohydr. Polym.* 2023, **304**, 120511.

[10] D. Hao, X. Wang, O. Yue, S. Liang, Z. Bai, J. Yang, X. Liu, X. Dang. A “wrench-like” green amphoteric organic chrome-free tanning agent provides long-term and effective antibacterial protection for leather. *J. Cleaner Prod.* 2023, **404**, 136917.

[11] D. Hao, X. Wang, S. Liang, O. Yue, X. Liu, D. Hao, X. Dang. Sustainable leather making — an amphoteric organic chrome-free tanning agents based on recycling waste leather. *Sci. Total Environ.* 2023, **867**, 161531.

[12] J. Chen, J. Ma, Q. Fan, W. Zhang. An eco-friendly metal-less tanning process, zr-based metal-organic frameworks as novel chrome-free tanning agent. *J. Cleaner Prod.* 2023, **382**, 135263.

[13] Q. Guo, J. Guo, H. Chen, P. Zhou, C. Li, K. Yang, N. Hua, J. Wang, M. Weng. Multi-functional graphene/leather for versatile wearable electronics. *J. Mater. Chem. A* 2023, **11**, 11773-11785.

[14] Z. Ma, X. Xiang, L. Shao, Y. Zhang, J. Gu. Multifunctional wearable silver nanowire decorated leather nanocomposites for joule heating, electromagnetic interference shielding and piezoresistive sensing. *Angew. Chem. Int. Ed.* 2022, **61**, e202200705.

[15] Z. Fan, L. Lu, M. Sang, J. Wu, X. Wang, F. Xu, X. Gong, T. Luo, K. C. Leung, S. Xuan. Wearable safeguarding leather composite with excellent sensing, thermal management, and electromagnetic interference shielding. *Adv. Sci.* 2023, **10**, e2302412.

[16] C. Mo, X. Lei, X. Tang, M. Wang, E. Kang, L. Xu, K. Zhang. Nanoengineering natural leather for dynamic thermal management and electromagnetic interference shielding. *Small* 2023, **19**, e2303368.

- [17] N. Cheng, Z. Wang, Y. Lin, X. Li, Y. Zhang, C. Ding, C. Wang, J. Tan, F. Sun, X. Wang, J. Yu, B. Ding. Breathable dual-mode leather-like nanotextile for efficient daytime radiative cooling and heating. *Adv. Mater.* 2024, **36**, e2403223.
- [18] J. Li, M. Cui, J. Wen, Y. Chen, B. Shi, H. Fan, J. Xiang. Leather-like hierarchical porous composites with outstanding electromagnetic interference shielding effectiveness and durability. *Composites Part B* 2021, **225**, 109272.
